# Supplementary material for: Distance to parks and non-residential destinations influences physical activity of older people, but crime doesn’t: a cross-sectional study in a southern European city
Source: Springer Nature journal article supplement (doi:10.1186/s12889-015-1879-y), 2015-06-26
Supplement: MOESM2 [file 9749584]

## Additional material 2: Categorization of crime records

| Category                                        | Description                                                                                                                             | Crime                                                                                                                                                                                                                                                                                                                                                                                                                                              |                                                                                                                                                                                                                                                                                                                                                                                           |
|-------------------------------------------------|-----------------------------------------------------------------------------------------------------------------------------------------|----------------------------------------------------------------------------------------------------------------------------------------------------------------------------------------------------------------------------------------------------------------------------------------------------------------------------------------------------------------------------------------------------------------------------------------------------|-------------------------------------------------------------------------------------------------------------------------------------------------------------------------------------------------------------------------------------------------------------------------------------------------------------------------------------------------------------------------------------------|
| Traffic<br>(n=2,270)                            | Crimes associated with the violation of traffic rules and road safety.                                                                  | <ul style="list-style-type: none"> <li>• Driving under the influence (1211)</li> <li>• Unlicensed driving (1015)</li> <li>• Reckless or dangerous driving (36)</li> </ul>                                                                                                                                                                                                                                                                          | <ul style="list-style-type: none"> <li>• Assault in traffic accident (7)</li> <li>• Homicide in traffic accident (1)</li> </ul>                                                                                                                                                                                                                                                           |
| Incivilities<br>(n=492)                         | Mild forms of misbehavior as public drunkenness, delinquent behavior and situations that cause disorder and sense of public insecurity. | <ul style="list-style-type: none"> <li>• Drug traffic (354)</li> <li>• Possession or traffic of prohibited weapons (64)</li> <li>• Other offenses related to drugs (60)</li> </ul>                                                                                                                                                                                                                                                                 | <ul style="list-style-type: none"> <li>• Heritage damage (3)</li> <li>• Drug possession (10)</li> <li>• Child possession and prostitution (1)</li> </ul>                                                                                                                                                                                                                                  |
| Criminal offenses without violence<br>(n=8,922) | Menacing crimes without victim approach                                                                                                 | <ul style="list-style-type: none"> <li>• Theft in motor vehicle (3,122)</li> <li>• Theft in residence with burglary, scaling or false keys (1404)</li> <li>• Theft by pickpocket (967)</li> <li>• Theft of motor vehicle (913)</li> <li>• Other thefts (774)</li> <li>• Theft in commercial or industrial building with burglary, scaling or false keys (676)</li> <li>• Threat or coercion (577)</li> <li>• Theft in supermarket (173)</li> </ul> | <ul style="list-style-type: none"> <li>• Coercion-resistance of worker (120)</li> <li>• Theft in other buildings, with burglary, scaling or false keys (89)</li> <li>• Theft in the school, with burglary, scaling or false keys (63)</li> <li>• Burglary (38)</li> <li>• Theft and traffic of art and culture (3)</li> <li>• Child abduction (2)</li> <li>• Human traffic (1)</li> </ul> |
| Criminal offenses with violence<br>(n=4,034)    | Menacing crimes with victim approach                                                                                                    | <ul style="list-style-type: none"> <li>• Simple assault (1200)</li> <li>• Domestic violence against partner (1125)</li> <li>• Robbery in the street (787)</li> <li>• Other domestic violence offenses (375)</li> <li>• Theft/pickpocketing (302)</li> <li>• Other robbery (141)</li> <li>• Aggravated assault (29)</li> <li>• Domestic violence against minors (23)</li> <li>• Robbery of public transport driver (13)</li> </ul>                  | <ul style="list-style-type: none"> <li>• Taking, confinement, or restrain (8)</li> <li>• Intentional homicide (7)</li> <li>• Child abuse (6)</li> <li>• Rape (6)</li> <li>• Child sexual abuse (5)</li> <li>• Other assault offenses (4)</li> <li>• Bank robbery (2)</li> <li>• Service station robbery (1)</li> </ul>                                                                    |
